# Supplementary material for: The first record of exceptionally-preserved spiral coprolites from the Tsagan-Tsab Formation (Lower Cretaceous), Tatal, western Mongolia
Source: Research Square preprint supplement (doi:10.21203/rs.3.rs-138265/v1), 2021-01-15
Supplement: Supplementary file 1 [file 2fbfdcbbd343dbd5ac50fd83.docx]

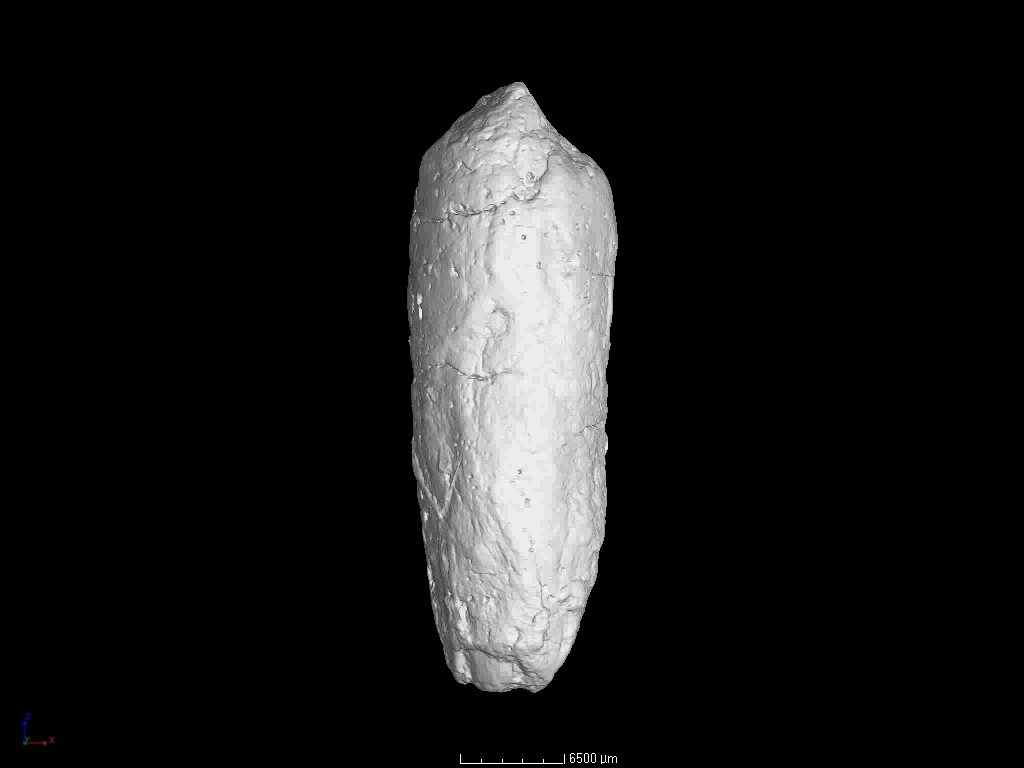
The first record of exceptionally-preserved spiral coprolites from the Tsagan-Tsab Formation (Lower Cretaceous), Tatal, western Mongolia

Paul Rummy, Kazim Halaclar & He Chen

**Supplemental Video.** 3D reconstruction of the inclusions in specimen IVPP V 27545
